# Supplementary material
Source: PubMed Central journal article supplement (PMC3406165)
Supplement: AEM.01588-12_zam999103541so1.pdf [file AEM.01588-12_zam999103541so1.pdf]

## Supplemental figures

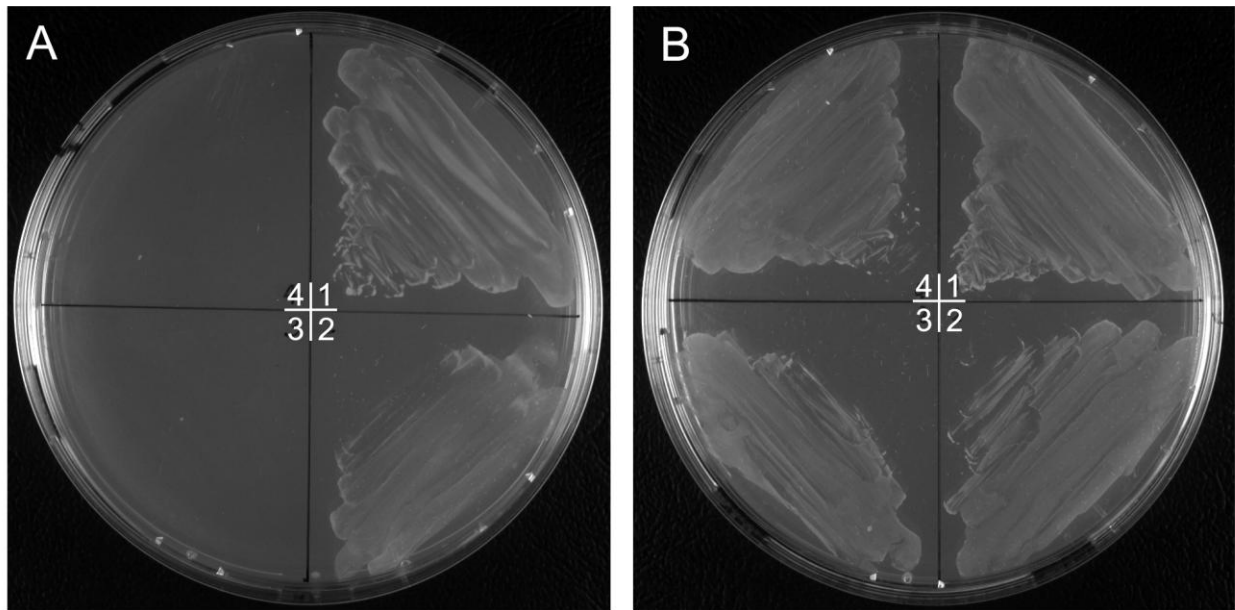

**Fig. S1.** Cultivation of *C. glutamicum* strains on minimal medium (MM) with 5 mM PAA (A) or 5 mM glucose as carbon source (B). MM agar plates with glucose were incubated for 24 h at 30 °C, while plates with PAA were incubated for 48 h at the same temperature. The growth of AS 1.542 and ATCC 13032/pEC-K18*mob2*::*paa* was also observed in MM broth, and same results were observed. Labels: 1, *C. glutamicum* AS 1.542; 2, *C. glutamicum* ATCC 13032/pEC-K18*mob2*::*paa*; 3, *C. glutamicum* ATCC 13032/pEC-K18*mob2*; 4, *C. glutamicum* ATCC 13032.

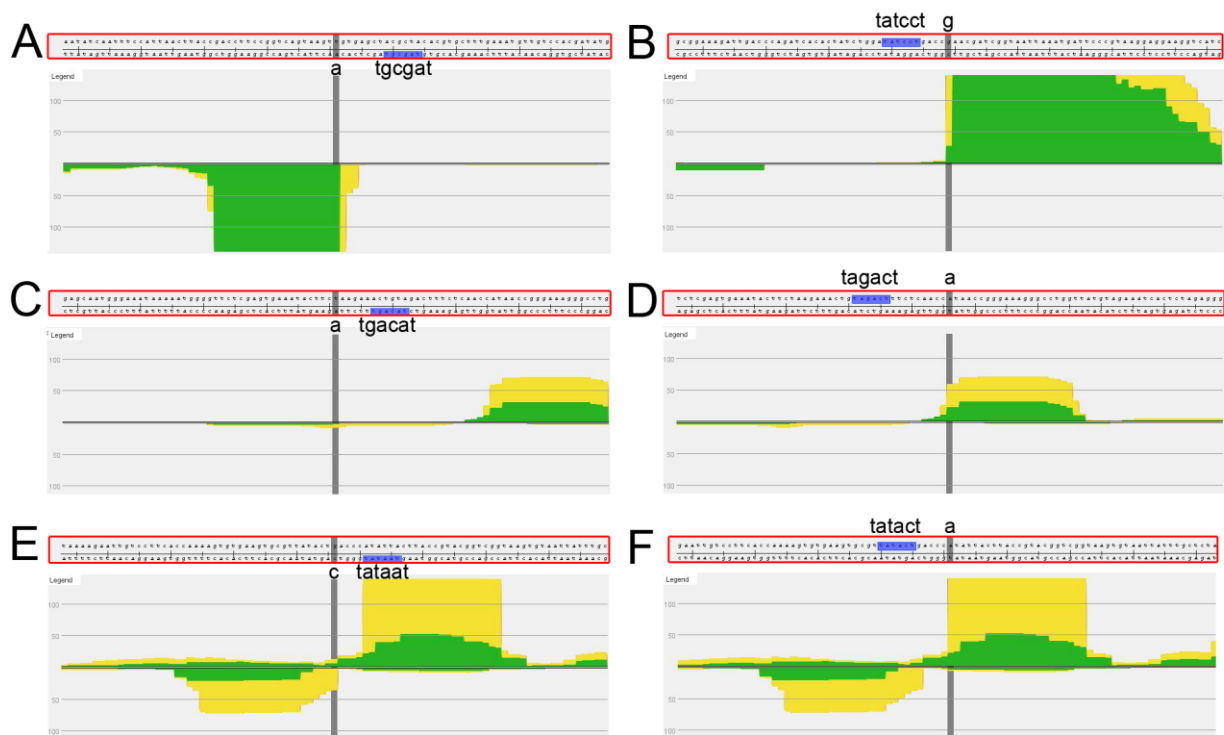

**Fig. S2.** Identification of probable transcription start sites (TSS) and promoter regions in the *paa* gene cluster of the strain AS 1.542. Letters A to F refer to region that spans the probable TSS and promoter of *paaK* (A), *paaA* (B), *paaR* (C), *paaI* (D), *paaY* (E), and *paaZ* (F) genes, and their sequence is shown in the red box. The TSS is indicated by gray background and the -10 region by blue background. The sequences of TSS and -10 regions are indicated outside the red box. Values for perfect and best matching reads (see Table 2, manuscript) are indicated by green and yellow color, respectively.

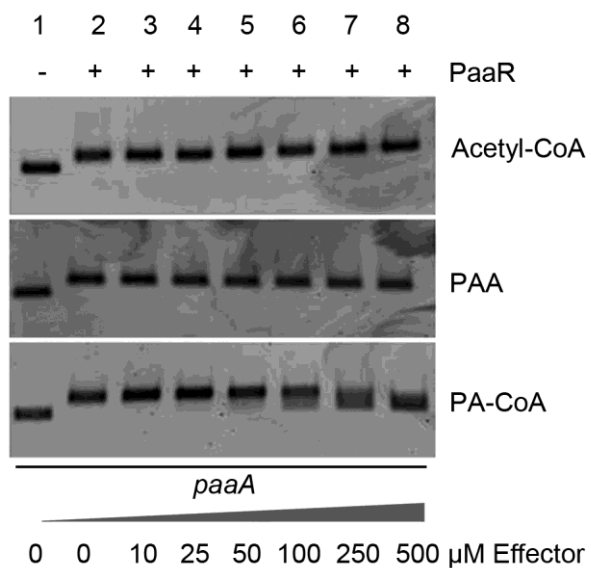

**Fig. S3.** Effect of Acetyl-CoA, PAA and PA-CoA on PaaR binding to the Cy3-labeled DNA probe for *paaA*. Whether 5 pmol PaaR protein was added to the reaction mixture is indicated by – and + above the gel picture. Acetyl-CoA, PAA and PA-CoA were added to the reaction mixture in the indicated concentration gradient.

## Supplemental Table S1. Bacteria strains, plasmids and primers used in this study

| Strain, plasmid or primer                          | Relevant features or sequences <sup>a</sup>                                                    | Source, reference or note                                         |             |
|----------------------------------------------------|------------------------------------------------------------------------------------------------|-------------------------------------------------------------------|-------------|
| <b><i>C. glutamicum</i> strains</b>                |                                                                                                |                                                                   |             |
| Strain AS 1.542                                    | Wild type strain AS 1.542                                                                      | (1)                                                               |             |
| AS 1.542/ <i>paaR</i> <sup>AHTH</sup>              | Strain AS 1.542 with deletion of the HTH domain of <i>paaR</i> gene                            | this study                                                        |             |
| ATCC 13032                                         | Type strain                                                                                    | (2)                                                               |             |
| ATCC 13032/<br>pEC-K18 <i>mob2</i> :: <i>paa</i>   | ATCC 13032 carrying pEC-K18 <i>mob2</i> :: <i>paa</i>                                          | this study                                                        |             |
| <b><i>E. coli</i> strains</b>                      |                                                                                                |                                                                   |             |
| ER2566                                             | NEB IMPACT Kit                                                                                 | NEB                                                               |             |
| ER2566/pTXB1:: <i>paaR</i>                         | PaaR protein expression strain carrying pTXB1:: <i>paaR</i>                                    | this study                                                        |             |
| <b>Plasmids</b>                                    |                                                                                                |                                                                   |             |
| pK18 <i>mobsacB</i>                                | cloning vector for allelic exchange, Km <sup>R</sup>                                           | (5)                                                               |             |
| pK18 <i>mobsacB</i> :: <i>paaR</i> <sup>AHTH</sup> | pK18 <i>mobsacB</i> carrying <i>paaR</i> gene with deletion of its HTH domain, Km <sup>R</sup> | this study                                                        |             |
| pTXB1                                              | NEB IMPACT Kit, Amp <sup>R</sup>                                                               | NEB                                                               |             |
| pTXB1:: <i>paaR</i>                                | pTXB1 derivative for expression of PaaR protein, Amp <sup>R</sup>                              | this study                                                        |             |
| pEC-K18 <i>mob2</i>                                | <i>C. glutamicum</i> cloning vector, Km <sup>R</sup>                                           | (3)                                                               |             |
| pEC-K18 <i>mob2</i> :: <i>paa</i>                  | pEC-K18 <i>mob2</i> carrying the whole cluster of <i>paa</i> genes, Km <sup>R</sup>            | this study                                                        |             |
| pETCRP                                             | pET-28a derivative containing the <i>glxR</i> gene from <i>C. glutamicum</i> , Km <sup>R</sup> | (4)                                                               |             |
| <b>Primers<sup>b</sup></b>                         |                                                                                                |                                                                   |             |
| 725_DL_HTH_A                                       | <u>AGGTC</u> TCGAATTCTCCGGTCAGTAAGTTGTGAG (Eco31I)                                             | To generate<br>pK18 <i>mobsacB</i> :: <i>paaR</i> <sup>AHTH</sup> |             |
| 725_DL_HTH_B                                       | GGATCCATTGCCGTTCTGTG                                                                           |                                                                   |             |
| 725_DL_HTH_C                                       | CACAGAACGGCAATGGATCCCTTGGGAAATGCTCGTTGGA                                                       |                                                                   |             |
| 725_DL_HTH_D                                       | <u>AGGTC</u> TCGGATCCGCTCCCTTGGTGGGAATTACA (Eco31I)                                            |                                                                   |             |
| paa_ga1                                            | TCACTCATTAGGCACCCCAGGGGGCTTGGTTTTAGAGGAAG                                                      | To generate<br>pEC-K18 <i>mob2</i> :: <i>paa</i>                  |             |
| paa_ga2                                            | AAACGTGGCAAATAGGCAGGAACCCCATACGAATCGCATC                                                       |                                                                   |             |
| paa_vector_ga1                                     | CTTCCTCTAAAACCAAGCCCCCTGGGGTGCCTAATGAGTGA                                                      |                                                                   |             |
| paa_vector_ga2                                     | GATGCGATTTCGTATGGGGTTCCTGCCTATTTGCCACGTTT                                                      |                                                                   |             |
| 723_RT_F                                           | CGTAGCCAATGACGAAGGTT                                                                           | For RT-qPCR<br>analysis of <i>paa</i><br>cluster genes            |             |
| 723_RT_R                                           | CAGCACTCCAAGCTGGTTAT                                                                           |                                                                   |             |
| 724_RT_F                                           | GTCAGTGGGGTGATGACAAG                                                                           |                                                                   |             |
| 724_RT_R                                           | CTCCGAACCATGGAGTGAAG                                                                           |                                                                   |             |
| 725_RT_F                                           | TAATTCTGCGGTGGTGTCTG                                                                           |                                                                   |             |
| 725_RT_R                                           | TTCGACTTCGTGGCAACTCT                                                                           |                                                                   |             |
| 727_RT_F                                           | TCGTTGAAGGCCATGGGTAT                                                                           |                                                                   |             |
| 727_RT_R                                           | CGGCGCAATGAAATGGATCT                                                                           |                                                                   |             |
| 728_RT_F                                           | GCCTGAGGCTAACTGGATTT                                                                           |                                                                   |             |
| 728_RT_R                                           | GTGCGAGCTGGGTAATTGAA                                                                           |                                                                   |             |
| 729_RT_F                                           | CTCAAACCGCGGATTATCCC                                                                           |                                                                   |             |
| 729_RT_R                                           | GTAGGTTGCATGGCGGTAAG                                                                           |                                                                   |             |
| 730_RT_F                                           | CCTTGGCTGGTGGATATCTC                                                                           |                                                                   |             |
| 730_RT_R                                           | AGATGACGGGCAATAGTCTG                                                                           |                                                                   |             |
| 731_RT_F                                           | TTGCTCGACTCTGGGACATT                                                                           |                                                                   |             |
| 731_RT_R                                           | AAAGCCTTCACGCTTTAGGG                                                                           |                                                                   |             |
| 732_RT_F                                           | GCCAGTACGTTGCTCTACGA                                                                           |                                                                   |             |
| 732_RT_R                                           | GAGGCTGGTGACGTGAATCT                                                                           |                                                                   |             |
| 733_RT_F                                           | GCTCGGGACGAAACATCAAA                                                                           |                                                                   |             |
| 733_RT_R                                           | ATCAAGGGTTGCGCCTAAGT                                                                           |                                                                   |             |
| 734_RT_F                                           | TTCGCCCTGATGATCTAGCA                                                                           |                                                                   |             |
| 734_RT_R                                           | GATTCCACCATCGCAGTAGC                                                                           |                                                                   |             |
| 735_RT_F                                           | TGCTCTGGTGCAGATATCG                                                                            |                                                                   |             |
| 735_RT_R                                           | GCTTCTGGCTGACCAAACCT                                                                           |                                                                   |             |
| 736_RT_F                                           | GCGGTTCCCTGAGTCTTTTGA                                                                          |                                                                   |             |
| 736_RT_R                                           | TGGGTAGCCACCACAATTTT                                                                           |                                                                   |             |
| 737_RT_F                                           | GCCTGCGTCATCATGAAGAA                                                                           |                                                                   |             |
| 737_RT_R                                           | GATGGCAACCGACAGTCTTT                                                                           |                                                                   |             |
| 738_RT_F                                           | CTCCCCAACCAATGTGAT                                                                             |                                                                   |             |
| 738_RT_R                                           | TGCTTCTGCGGTGATGTAAAC                                                                          |                                                                   |             |
| 740_RT_F                                           | GCGCACCCCAAGACTTTAAC                                                                           |                                                                   |             |
| 740_RT_R                                           | TCCCTGCAACTCCCCTATAC                                                                           |                                                                   |             |
| 725E_int1                                          | GGTGGT <u>CATATG</u> ATGACTCCAACGAGCATTTC (NdeI)                                               |                                                                   | To generate |

|                               |                                                        |                                                                                    |
|-------------------------------|--------------------------------------------------------|------------------------------------------------------------------------------------|
| 725E_int2                     | GGTGGTT <u>GCTCTTCCGCAAGT</u> GCTGGGTGTGGCTGTTT (SapI) | pTXB1::paaR                                                                        |
| 724_upstream_F <sup>b</sup>   | GGTCCATTGTGGGTGGAAGA                                   | To generate Cy3 labeled upstream DNA probes of paaK, paaR/I, paaA, paaY/Z and hemH |
| 724_upstream_R                | CCACACCCAGCACTTAGACT                                   |                                                                                    |
| 725_upstream_F                | CCGGTGGCGGGAAGCGCTTG                                   |                                                                                    |
| 725_upstream_R <sup>b</sup>   | CCAGGTCAGACTCAATTTGT                                   |                                                                                    |
| 728_upstream_F                | TTCGGGGAATGCTCGAACT                                    |                                                                                    |
| 728_upstream_R <sup>b</sup>   | GCTGTATCTGCGTTTGTGTC                                   |                                                                                    |
| 738_upstream_F                | CAGTTCGCCGAGCTGAATAG                                   |                                                                                    |
| 738_upstream_R <sup>b</sup>   | CCCCTGTCCCTGAAGGTAG                                    |                                                                                    |
| hemH_EMSA_1                   | CGTGGTACGCCCTCATTTAGT                                  |                                                                                    |
| hemH_EMSA_2 <sup>b</sup>      | CATCCGATGTGCGTTCATTC                                   |                                                                                    |
| 724_oligo_F                   | TTTCCATTAACCTACCGACCTTCCGGTCAGTAAGTTGTGA               |                                                                                    |
| 724_oligo_R                   | TCACAACCTACTGACCGGAAGGTCGGTAAGTTAATGGAAA               |                                                                                    |
| 725_oligo_F                   | TTTCTCAACCATAACCGGGAAGGGCCTGGTTATGTAGAA                |                                                                                    |
| 725_oligo_R                   | TTCTACATAACCAGGCCCTTTCCCGGTTATGGTTGAGAAA               |                                                                                    |
| 728_oligo_F                   | TCTGGATATCCTGACCGAACGATCGGTAATTAATGATTC                |                                                                                    |
| 728_oligo_R                   | GAATCATTTAATTACCGATCGTTCGGTCAGGATATCCAGA               |                                                                                    |
| 738_oligo_F                   | ACCCATATTACTTACCGTACGGTCGGTAAGTGTAAATTATT              |                                                                                    |
| 738_oligo_R                   | AATAATTACACTTACCGACCGTACGGTAAGTAATATGGGT               |                                                                                    |
| argC_EMSA1                    | CAAAAATTTATGCATGAATAATTTGCATGATCATGCATAA               |                                                                                    |
| argC_EMSA2                    | TTATGCATGATCATGCAAATTTATCATGCATAAATTTTTG               |                                                                                    |
| 724_oligo_GlxR_F <sup>b</sup> | TTTCAAAGCACGTGTAGCGTAGCTCACAACCTACTGACCG               | To generate Cy3 labeled DNA fragments of paaK, paaA and paaY/Z for GlxR EMSA       |
| 724_oligo_GlxR_R              | CGGTCAGTAAGTTGTGAGCTACGCTACACGTGCTTTGAAA               |                                                                                    |
| 728_oligo_GlxR_F <sup>b</sup> | GATCGCGGAAAGATTGACCCAGATCACACTATCTGGATAT               |                                                                                    |
| 728_oligo_GlxR_R              | ATATCCAGATAGTGTGATCTGGGTCAATCTTCCGCGATC                |                                                                                    |
| 738_oligo_GlxR_F <sup>b</sup> | CTTACCAAAAAGTGTGAAGTGC GTTATACTGACCCATATT              |                                                                                    |
| 738_oligo_GlxR_R              | AATATGGGTGAGTATAACGCACTTCACACTTTTGGTGAAG               |                                                                                    |

<sup>a</sup> Restriction enzyme cut sites are underlined.

<sup>b</sup> These primers are labeled with Cy3 fluorescence.

### References for supplemental Table S1

- Chen, Q., and L.-G. Li.** 1975. The identification of a L-glutamate-producing bacterium *Corynebacterium crenatum* AS 1.542. Acta Microbiologica Sinica (Wei Sheng Wu Xue Bao). **15**:119-124 (in Chinese).
- Kalinowski, J., B. Bathe, D. Bartels, N. Bischoff, M. Bott, A. Burkovski, N. Dusch, L. Eggeling, B. J. Eikmanns, L. Gaigalat, A. Goesmann, M. Hartmann, K. Huthmacher, R. Krämer, B. Linke, A. C. McHardy, F. Meyer, B. Möckel, W. Pfefferle, A. Pühler, D. A. Rey, C. Rückert, O. Rupp, H. Sahn, V. F. Wendisch, I. Wiegräbe, and A. Tauch.** 2003. The complete *Corynebacterium glutamicum* ATCC 13032 genome sequence and its impact on the production of L-aspartate-derived amino acids and vitamins. J. Biotechnol. **104**:5-25.
- Kirchner, O., and A. Tauch.** 2003. Tools for genetic engineering in the amino acid-producing bacterium *Corynebacterium glutamicum*. J. Biotechnol. **104**:287-299.
- Letek, M., N. Valbuena, A. Ramos, E. Ordóñez, J. A. Gil, and L. M. Mateos.** 2006. Characterization and use of catabolite-repressed promoters from gluconate genes in *Corynebacterium glutamicum*. J. Bacteriol. **188**:409-423.
- Schäfer, A., A. Tauch, W. Jäger, J. Kalinowski, G. Thierbach, and A. Pühler.** 1994. Small mobilizable multi-purpose cloning vectors derived from the *Escherichia coli* plasmids pK18 and pK19: selection of defined deletions in the chromosome of *Corynebacterium glutamicum*. Gene **145**:69-73.
